# Supplementary material for: Alemtuzumab CARE-MS II 5-year follow-up: Efficacy and safety findings
Source: PubMed Central journal article supplement — Neurology. 2017 Sep 12;89(11):1117–26. doi: 10.1212/WNL.0000000000004354 (PMC5595276; doi:10.1212/wnl.0000000000004354), 2017-09-12
Supplement: supp_WNL.0000000000004354_Figure_e-1.pdf [file supp_WNL.0000000000004354_Figure_e-1.pdf]

# Suppl. figure e-1

**A**

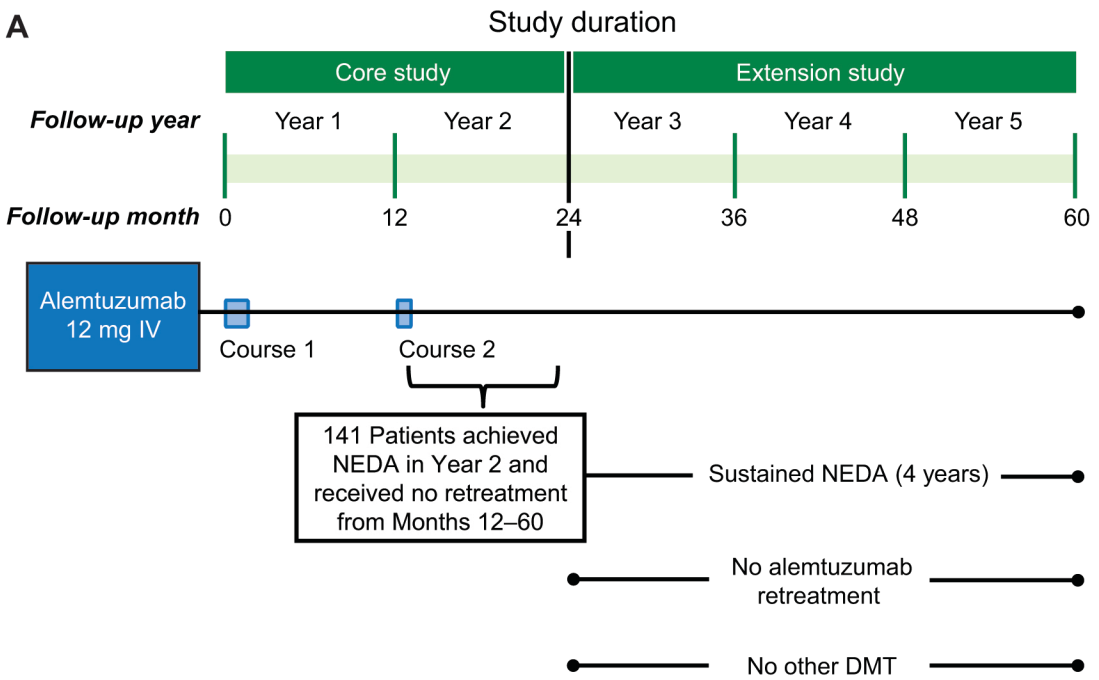

**B**

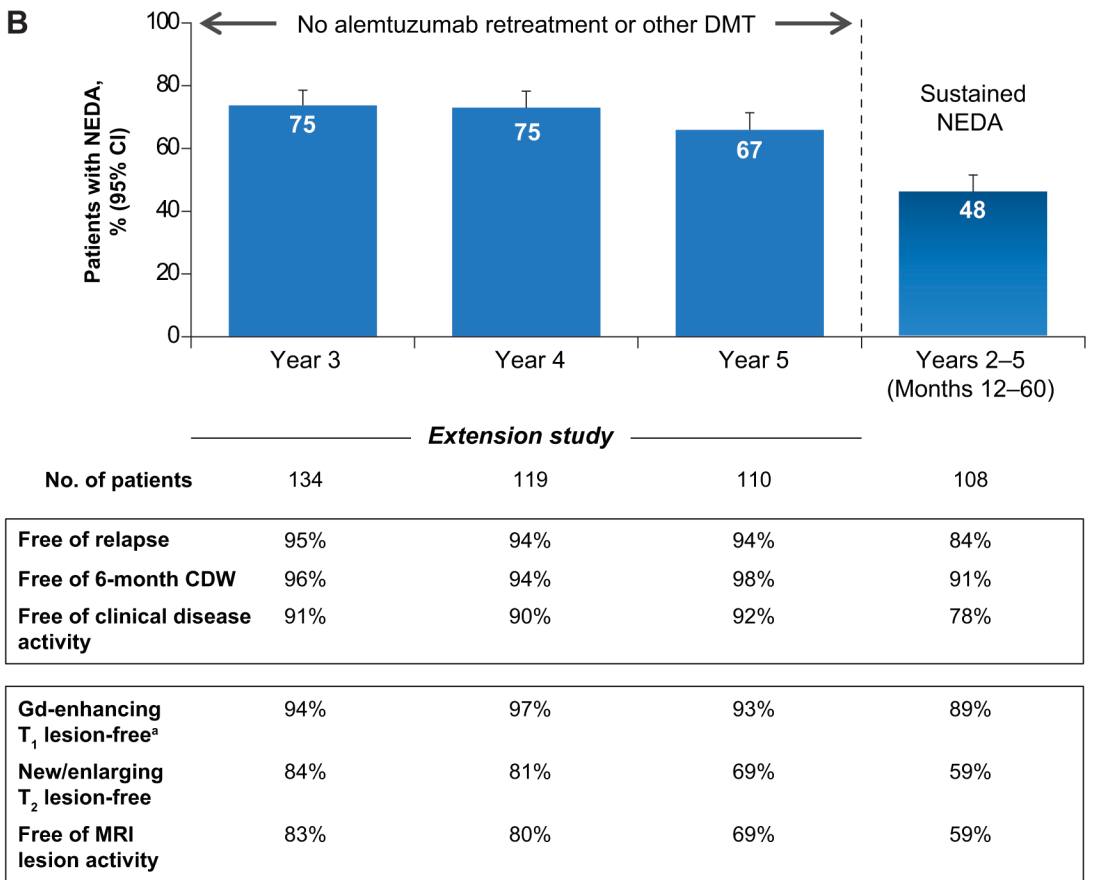

**Figure e-1 Sustained NEDA outcomes for 4 years in patients who received only the initial 2 courses of alemtuzumab**

(A) Schematic for the methodology for describing patients with 4-year sustained NEDA. (B) NEDA outcomes were assessed for patients who received the initial 2 alemtuzumab courses in the core CARE-MS II study, achieved NEDA at Year 2 of the core study, and received no alemtuzumab retreatment since Month 12 or treatment with another DMT through 5 years. Sustained outcomes were calculated cumulatively over Years 2–5. <sup>a</sup>Baseline percentage of patients Gd-enhancing lesion-free: 59%. CDW = confirmed disability worsening; DMT = disease-modifying therapy; Gd = gadolinium; NEDA = no evidence of disease activity.
