# Supplementary material for: Alemtuzumab CARE-MS II 5-year follow-up: Efficacy and safety findings
Source: PubMed Central journal article supplement — Neurology. 2017 Sep 12;89(11):1117–26. doi: 10.1212/WNL.0000000000004354 (PMC5595276; doi:10.1212/wnl.0000000000004354), 2017-09-12
Supplement: supp_WNL.0000000000004354_Figure_e-2.pdf [file supp_WNL.0000000000004354_Figure_e-2.pdf]

## Suppl. figure e-2

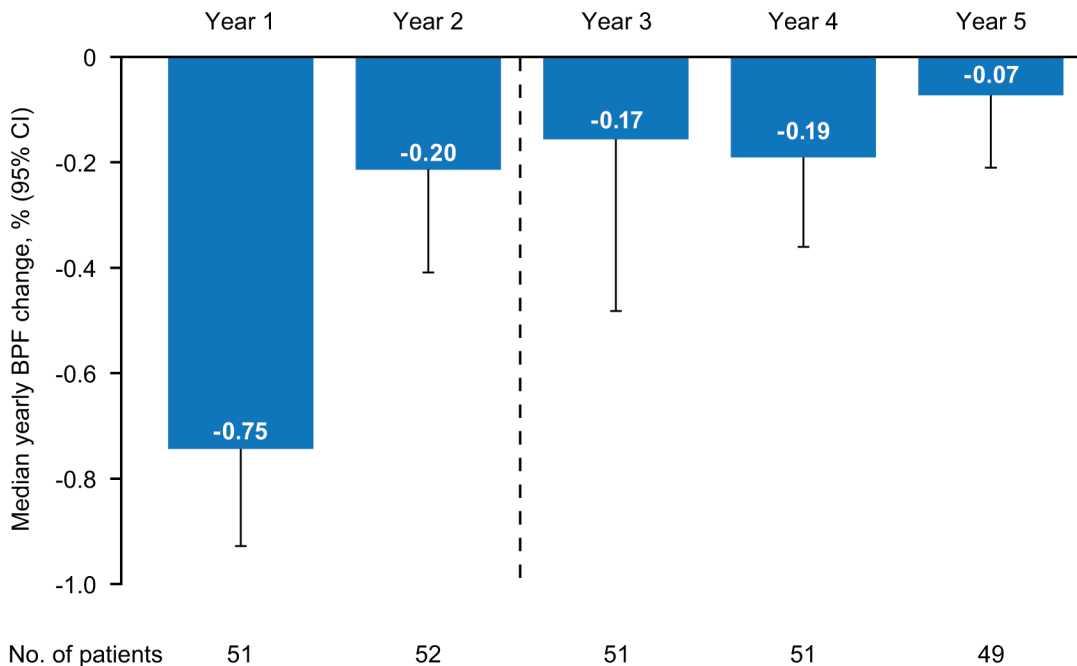

**Figure e-2 Brain volume loss over 5 years in patients with sustained NEDA over Years 2–5**  
Median percentage yearly change in BPF. Results are shown for patients who received the initial 2 alemtuzumab courses in the core CARE-MS II study, achieved NEDA at Year 2 of the core study, and maintained NEDA through the extension study without alemtuzumab retreatment or treatment with another disease-modifying therapy. BPF = brain parenchymal fraction; NEDA = no evidence of disease activity.
